# Supplementary material
Source: MDPI journal article supplement (https://www.mdpi.com/2673-4605/6/1/30)
Supplement: s1 [file s1]

Armando Benenato<sup>1a</sup>, Barbara Ferracuti<sup>1b</sup>, Stefania Imperatore<sup>1c</sup>, Mahdi Kioumarsi<sup>2d</sup>, Simone Spagnuolo<sup>3e</sup>

<sup>1</sup> Department of Civil Engineering, "Niccolò Cusano" University of Rome, Via Don Carlo Gnocchi, 3, 00166 Rome, Italy

<sup>2</sup> Department of Civil Engineering and Energy Technology, Oslo Metropolitan University, Pilestredet 35, 0166 Oslo, Norway.

<sup>3</sup> Dept. of Civil Eng. and Computer Science Eng. (DICII), Tor Vergata University of Rome, Via del Politecnico, 3, 00133 Rome, Italy

Prestressed reinforced concrete beams are widely used in industrial and commercial buildings, which are commonly exposed to aggressive environments and damaged by corrosion. This precast construction technique has been also used for the last 50 years in the majority of viaducts and bridges built in many countries like Italy. According to previous literature results, corrosion of prestressed concrete structures causes size reduction of strands, degradation of mechanical properties of steel, cracking of the surrounding concrete and bond decay at steel-to-concrete interface. The mixing of these effects strongly reduces the bearing-capacity of prestressed reinforced concrete members, changing the failure mechanism as well. In the framework of the OPTION research project between Niccolò Cusano University and Oslo Metropolitan University, an experimental campaign investigates the behaviour of corroded prestressed beams. Four prestressed beams (cross section size 200 × 300; total length 3000 mm; clear span 2700 mm) were first subjected to artificial corrosion, to obtain different damage levels, and then were tested in four-point bending. The goal is to estimate the corrosion level making a deteriorated prestressed reinforced concrete beam less ductile keeping the strength unchanged. In the present study, the first experimental results and some details about the laboratory procedure are presented.

## Dimensions and reinforcement arrangement of the tested beams

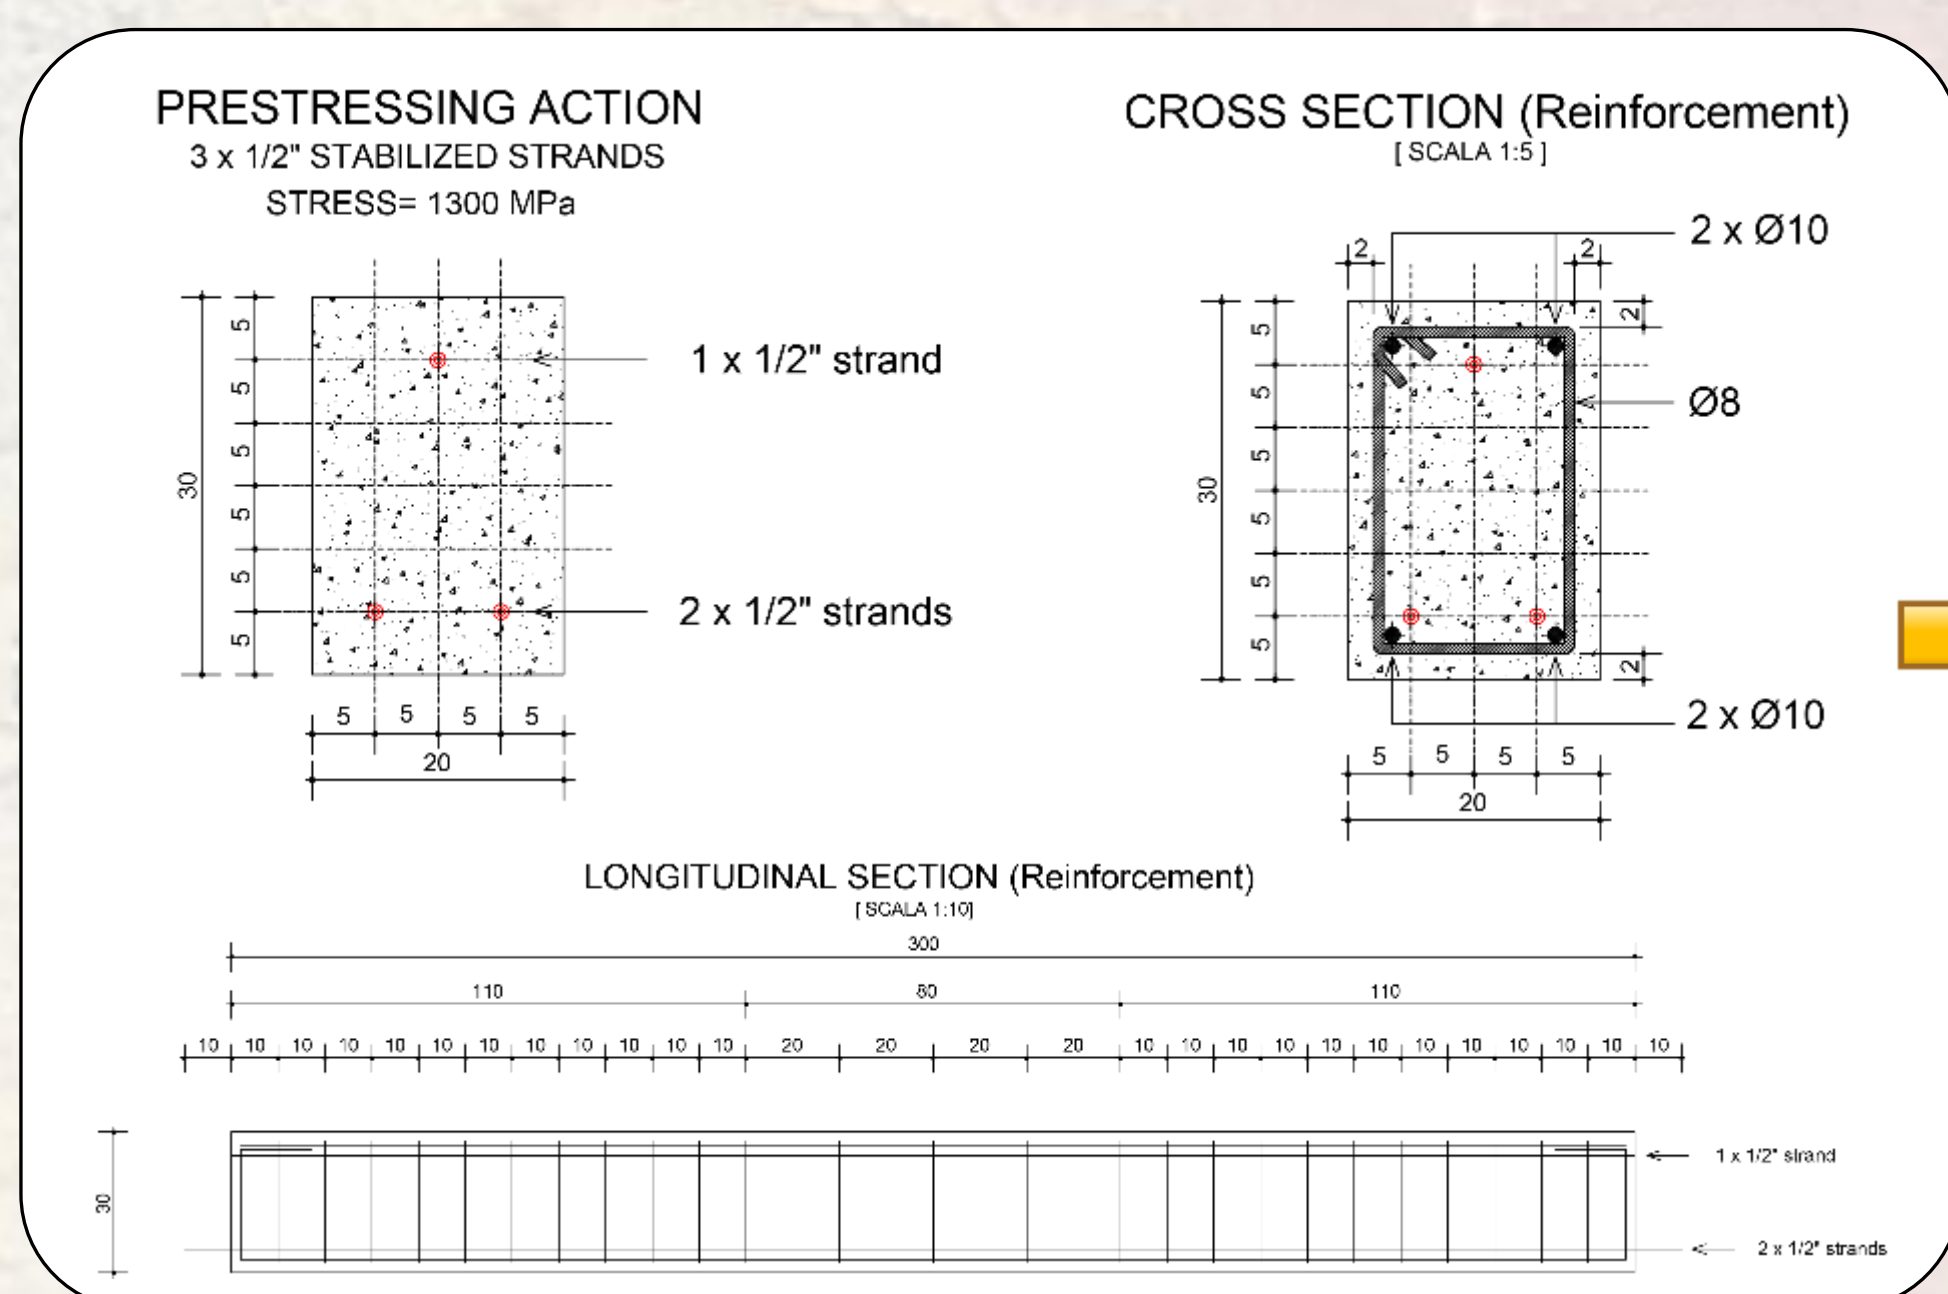

## Particular of reinforcement arrangement of the tested beams

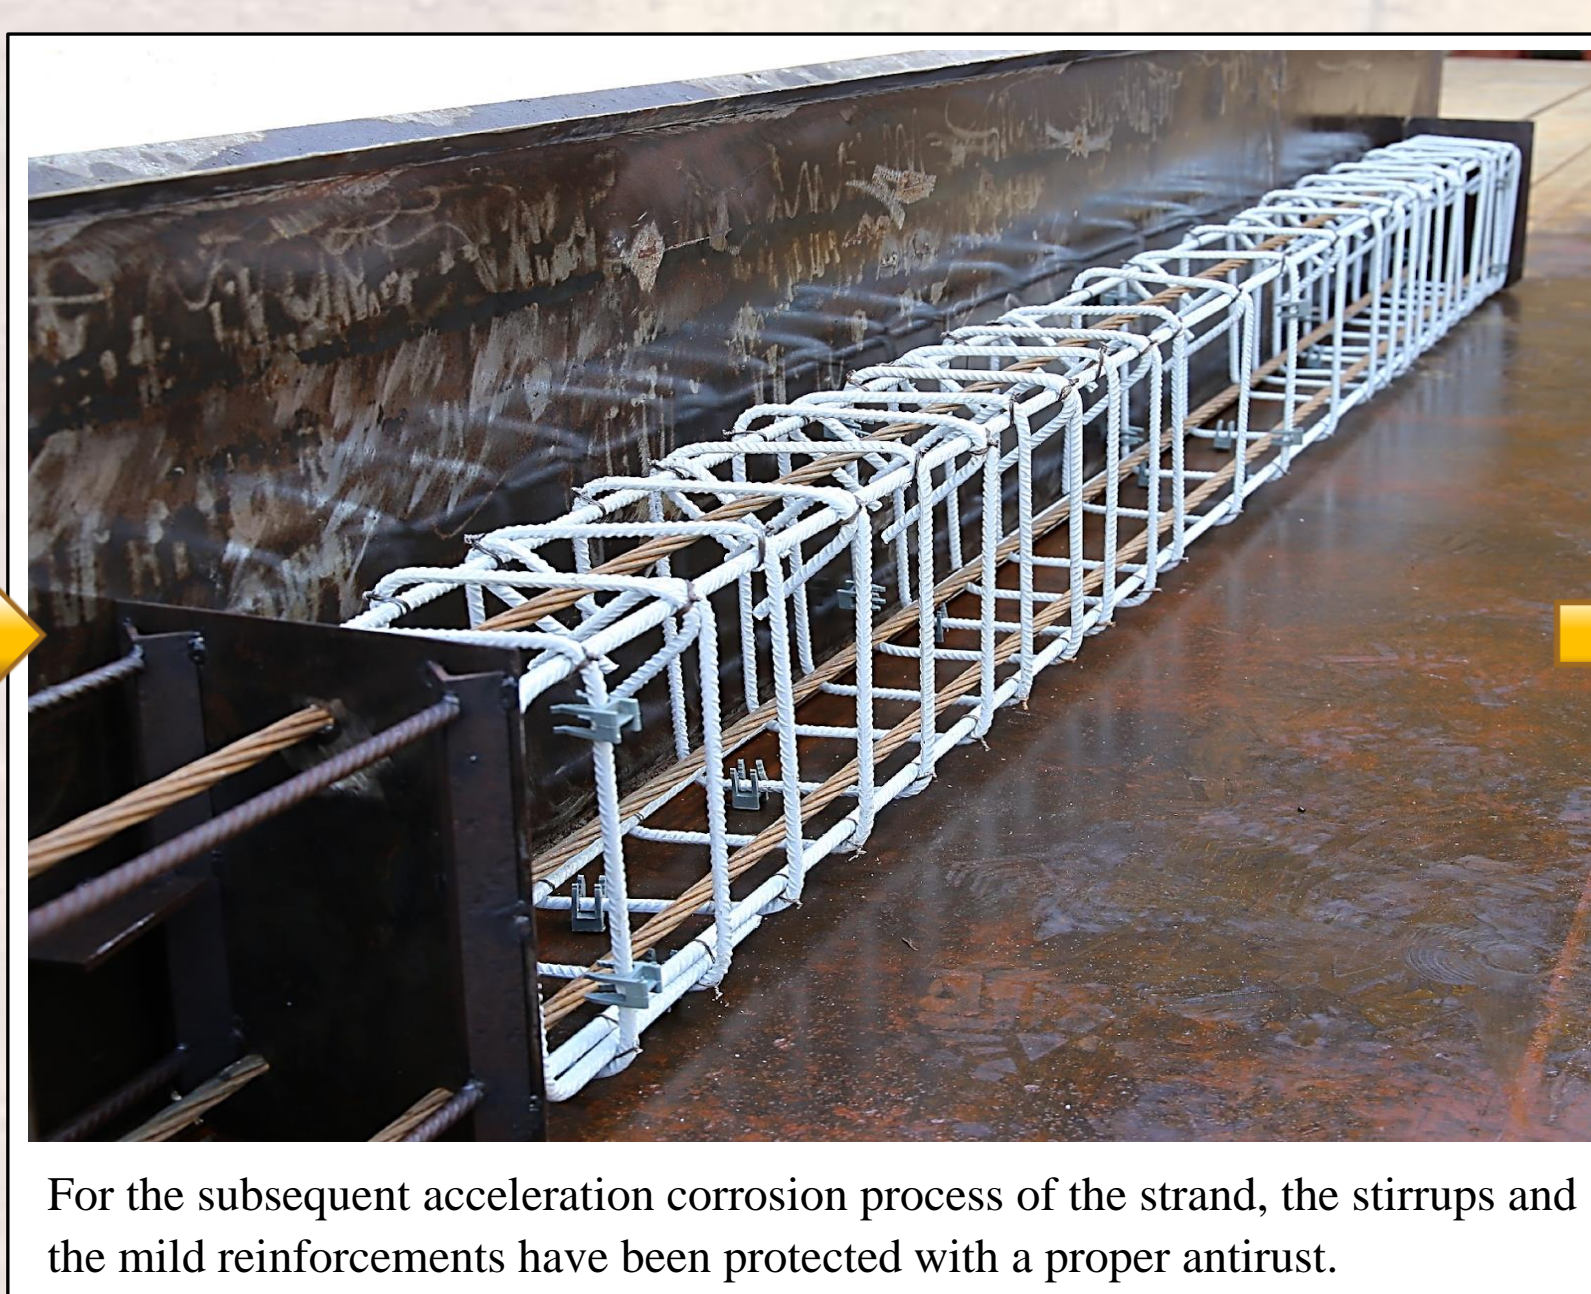

## Particular of the beam arrangement before artificial corrosion

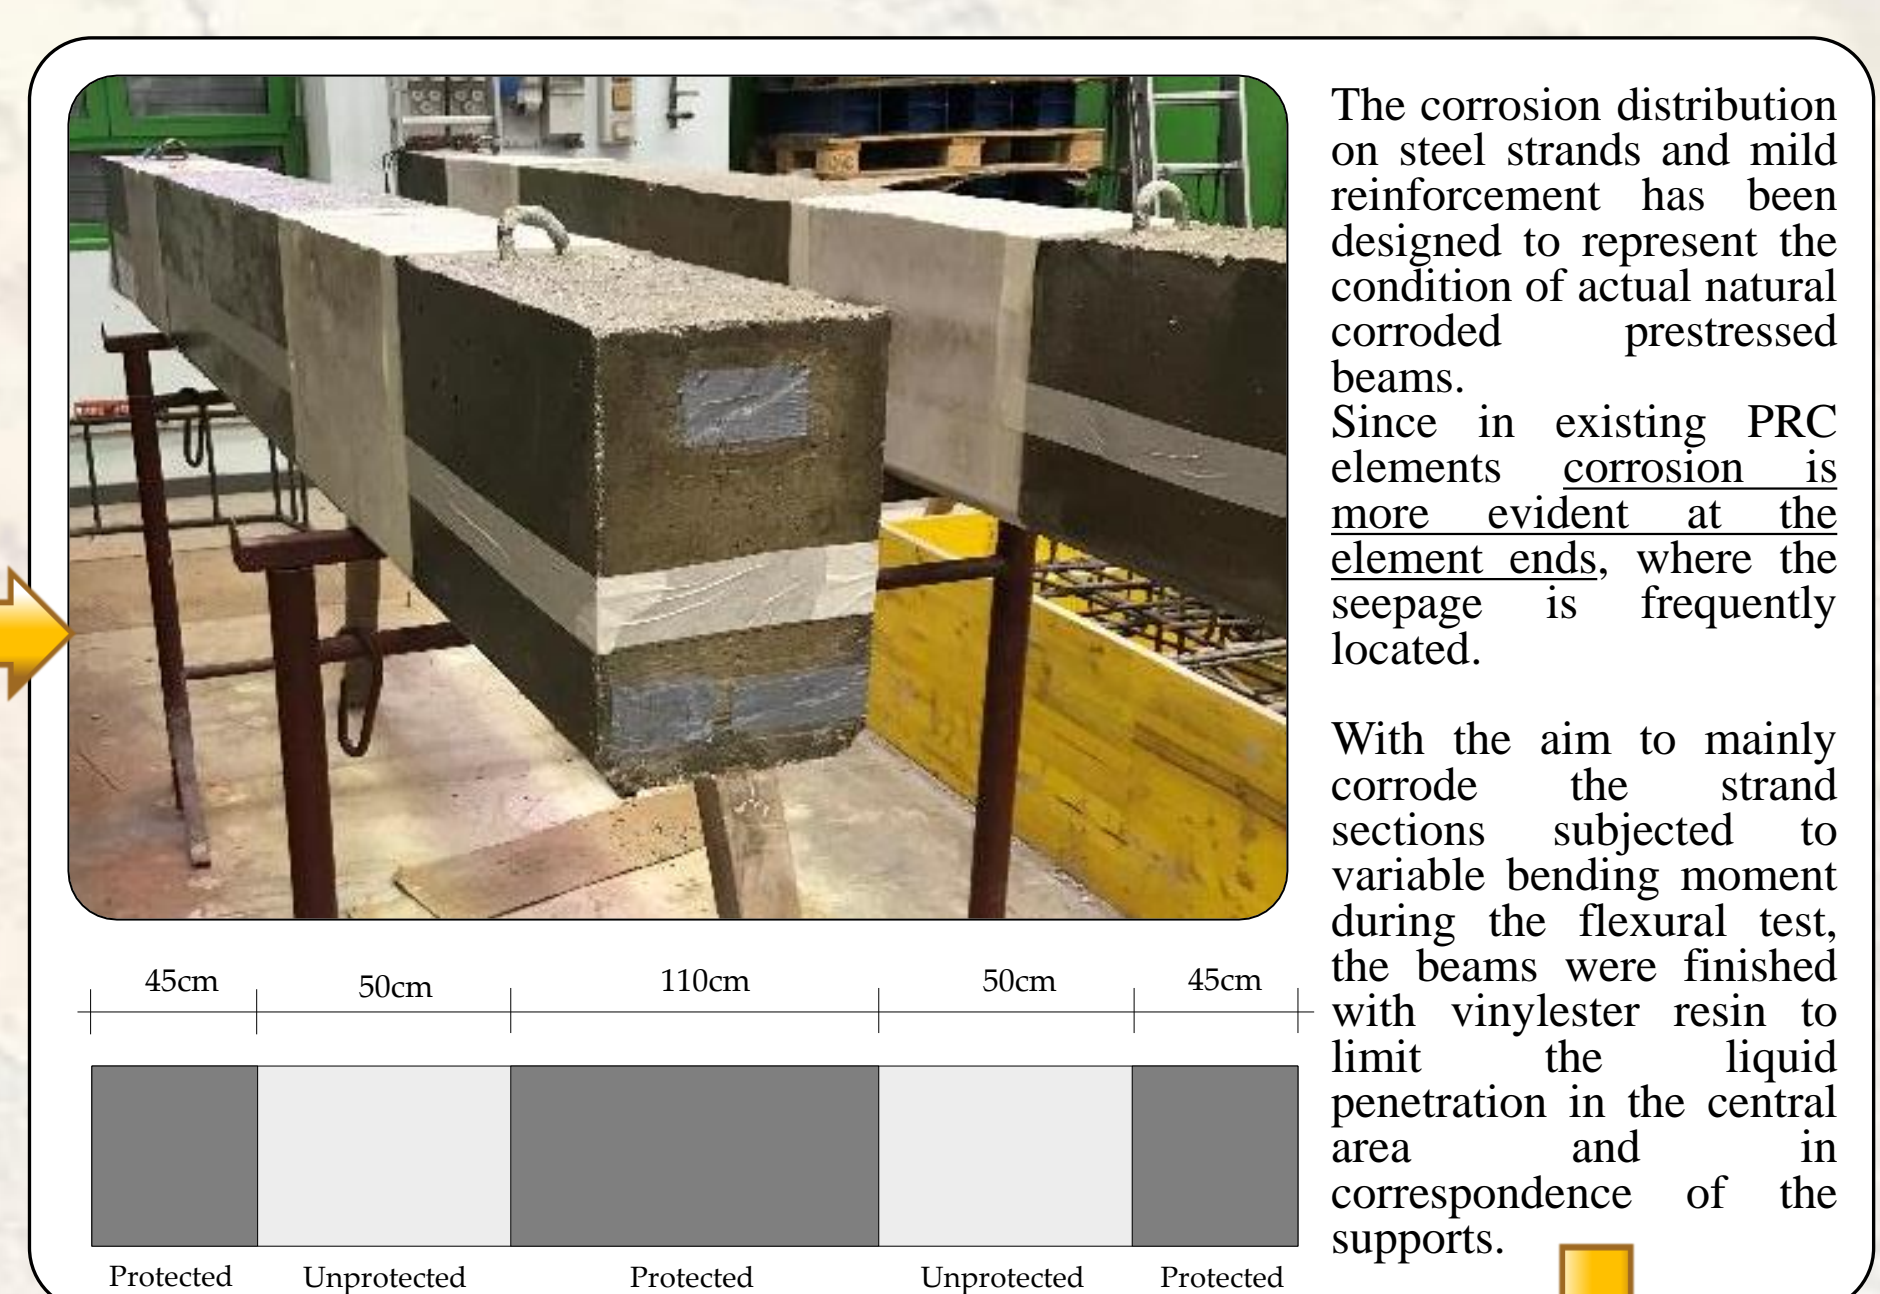

## Flexural test setup

## Crack width measuring process

## Accelerated corrosion process

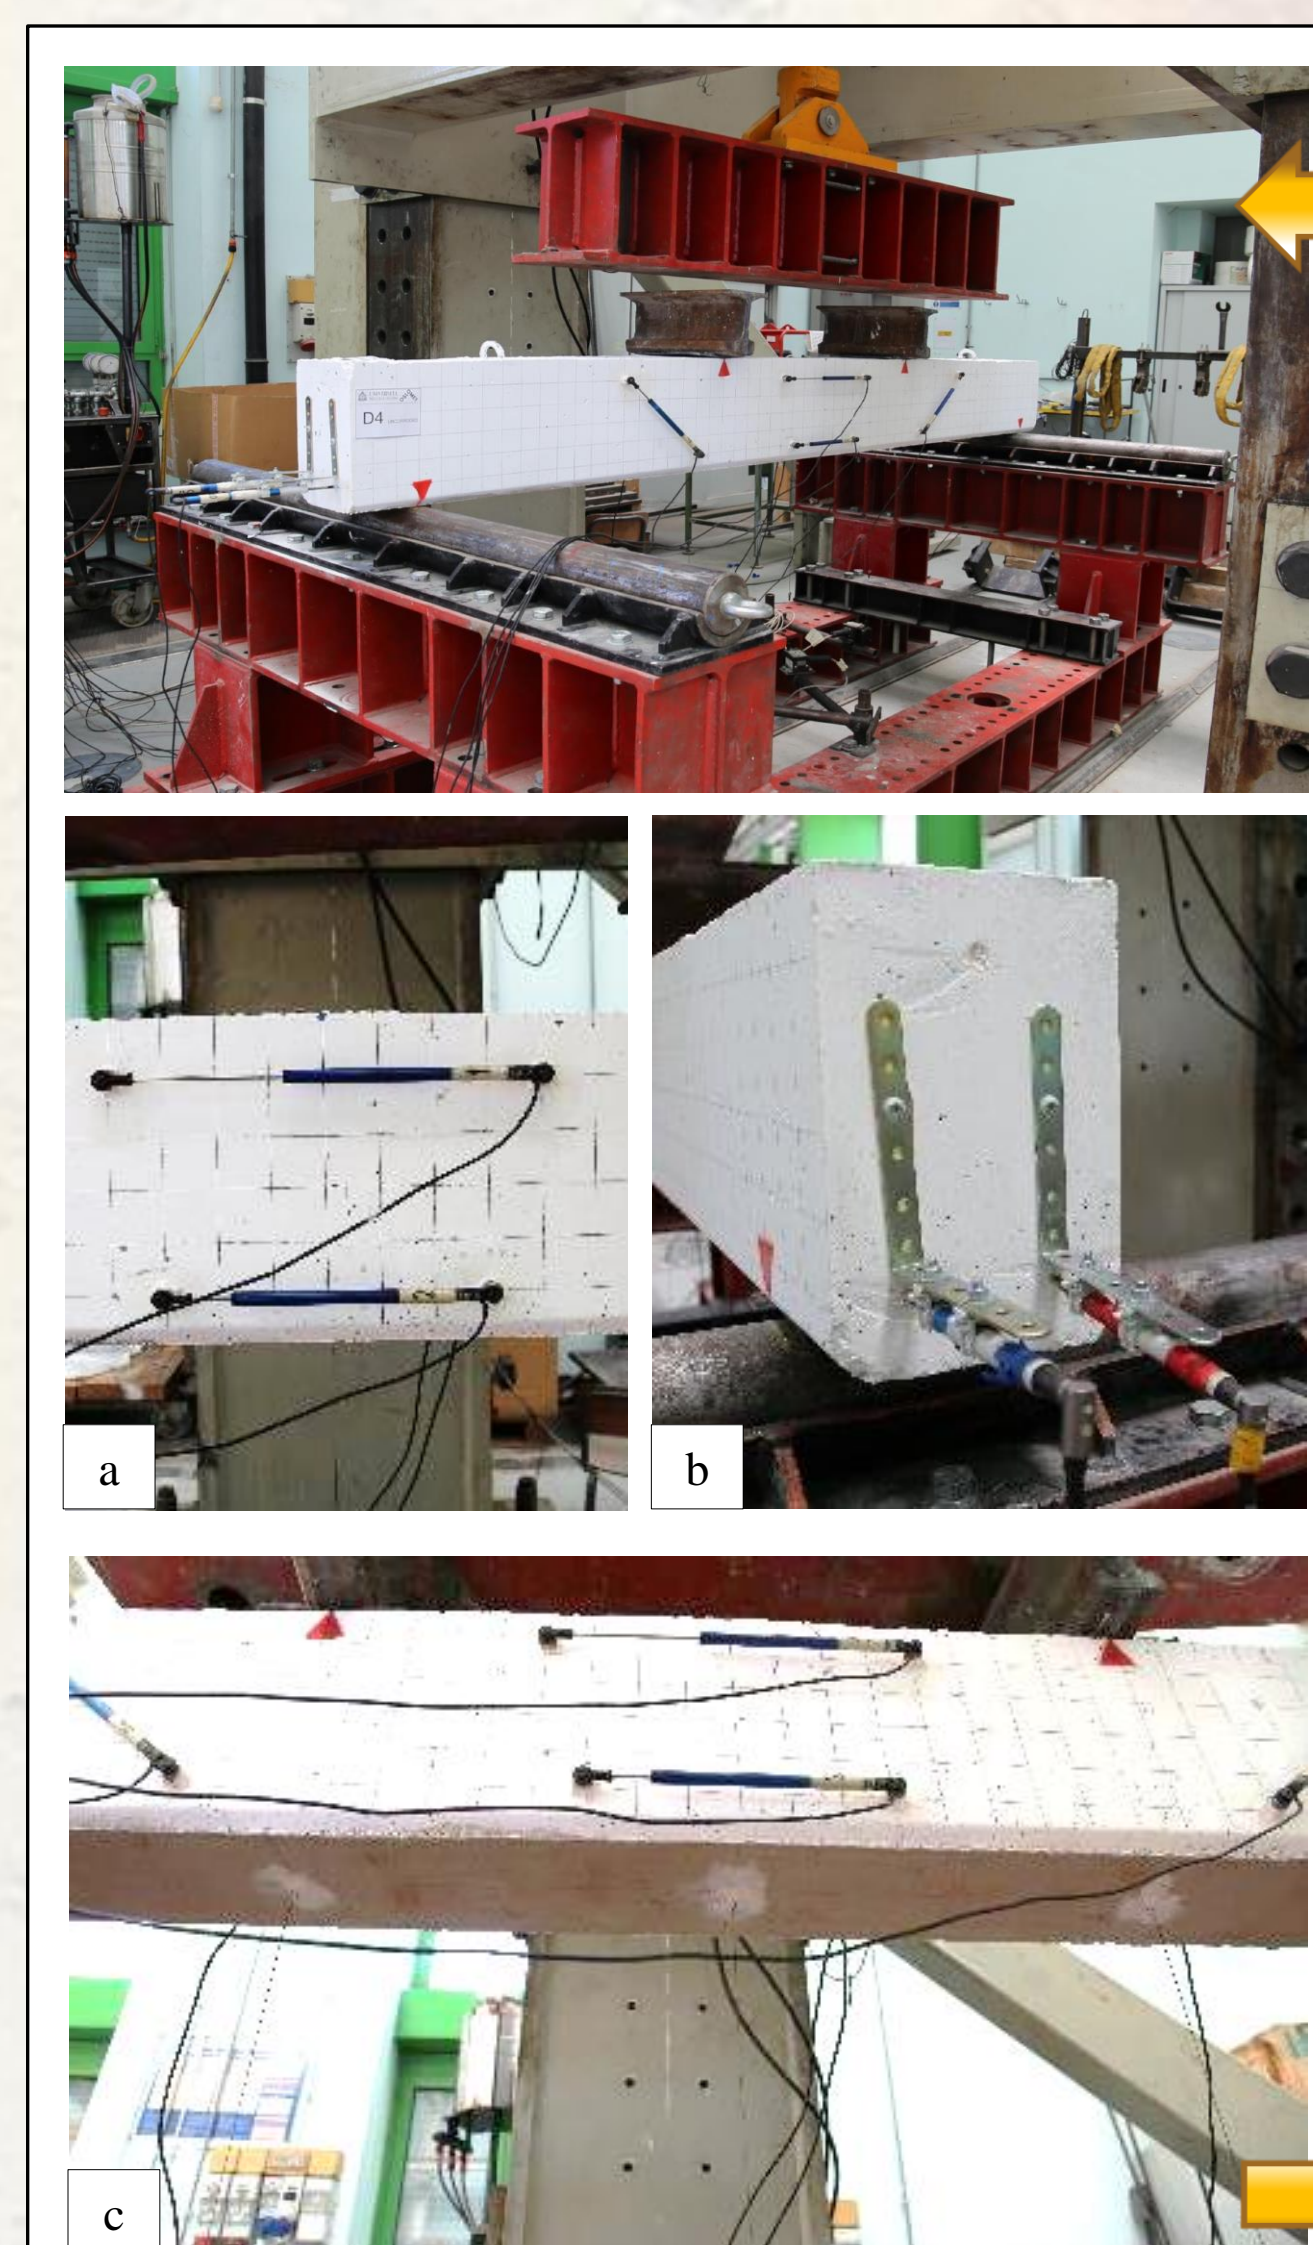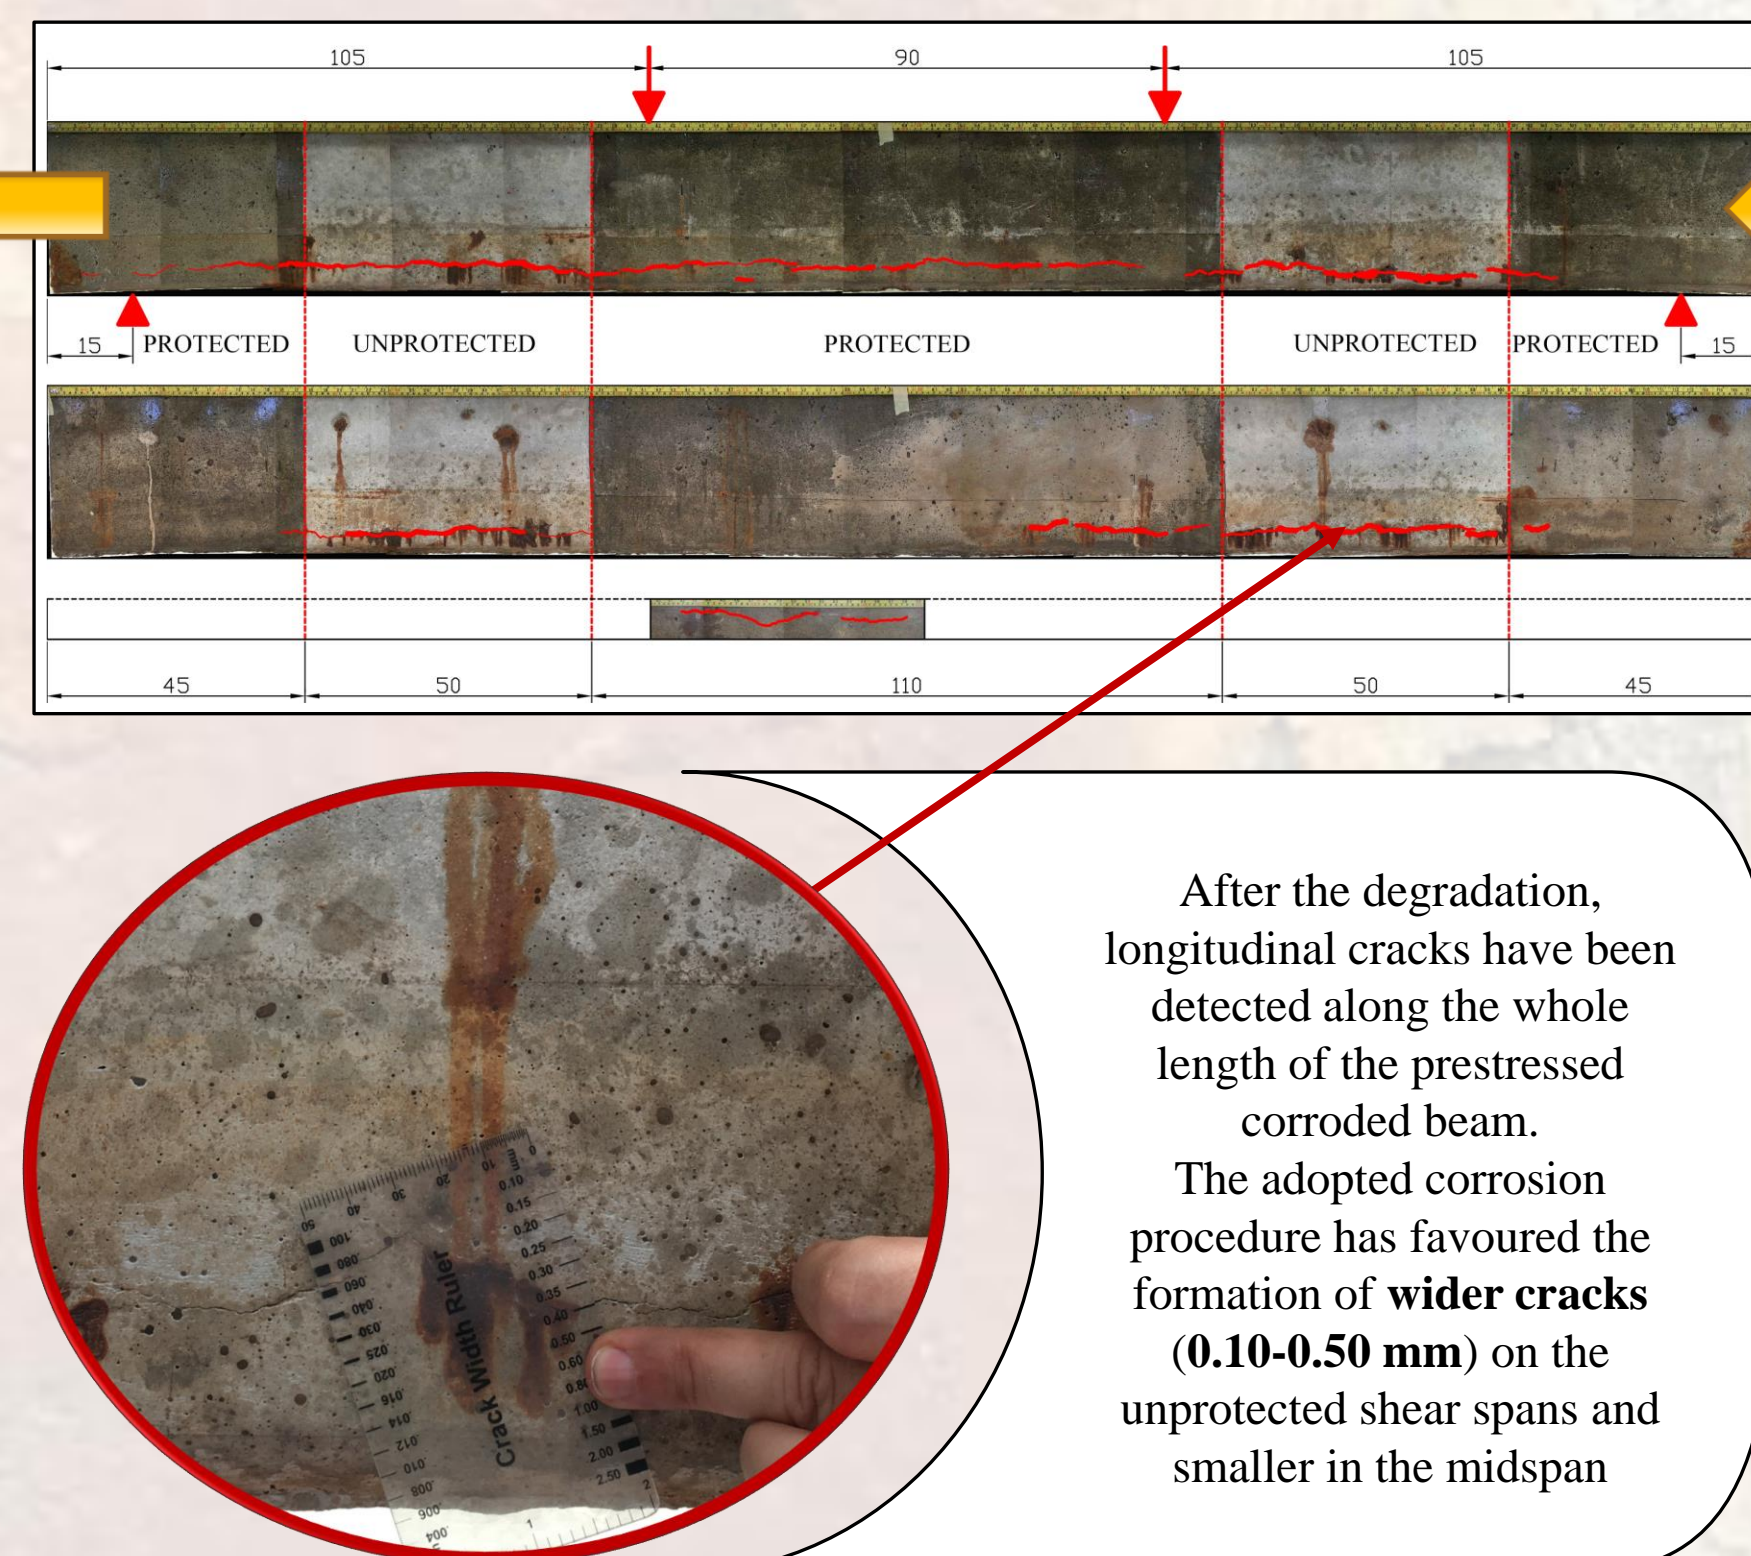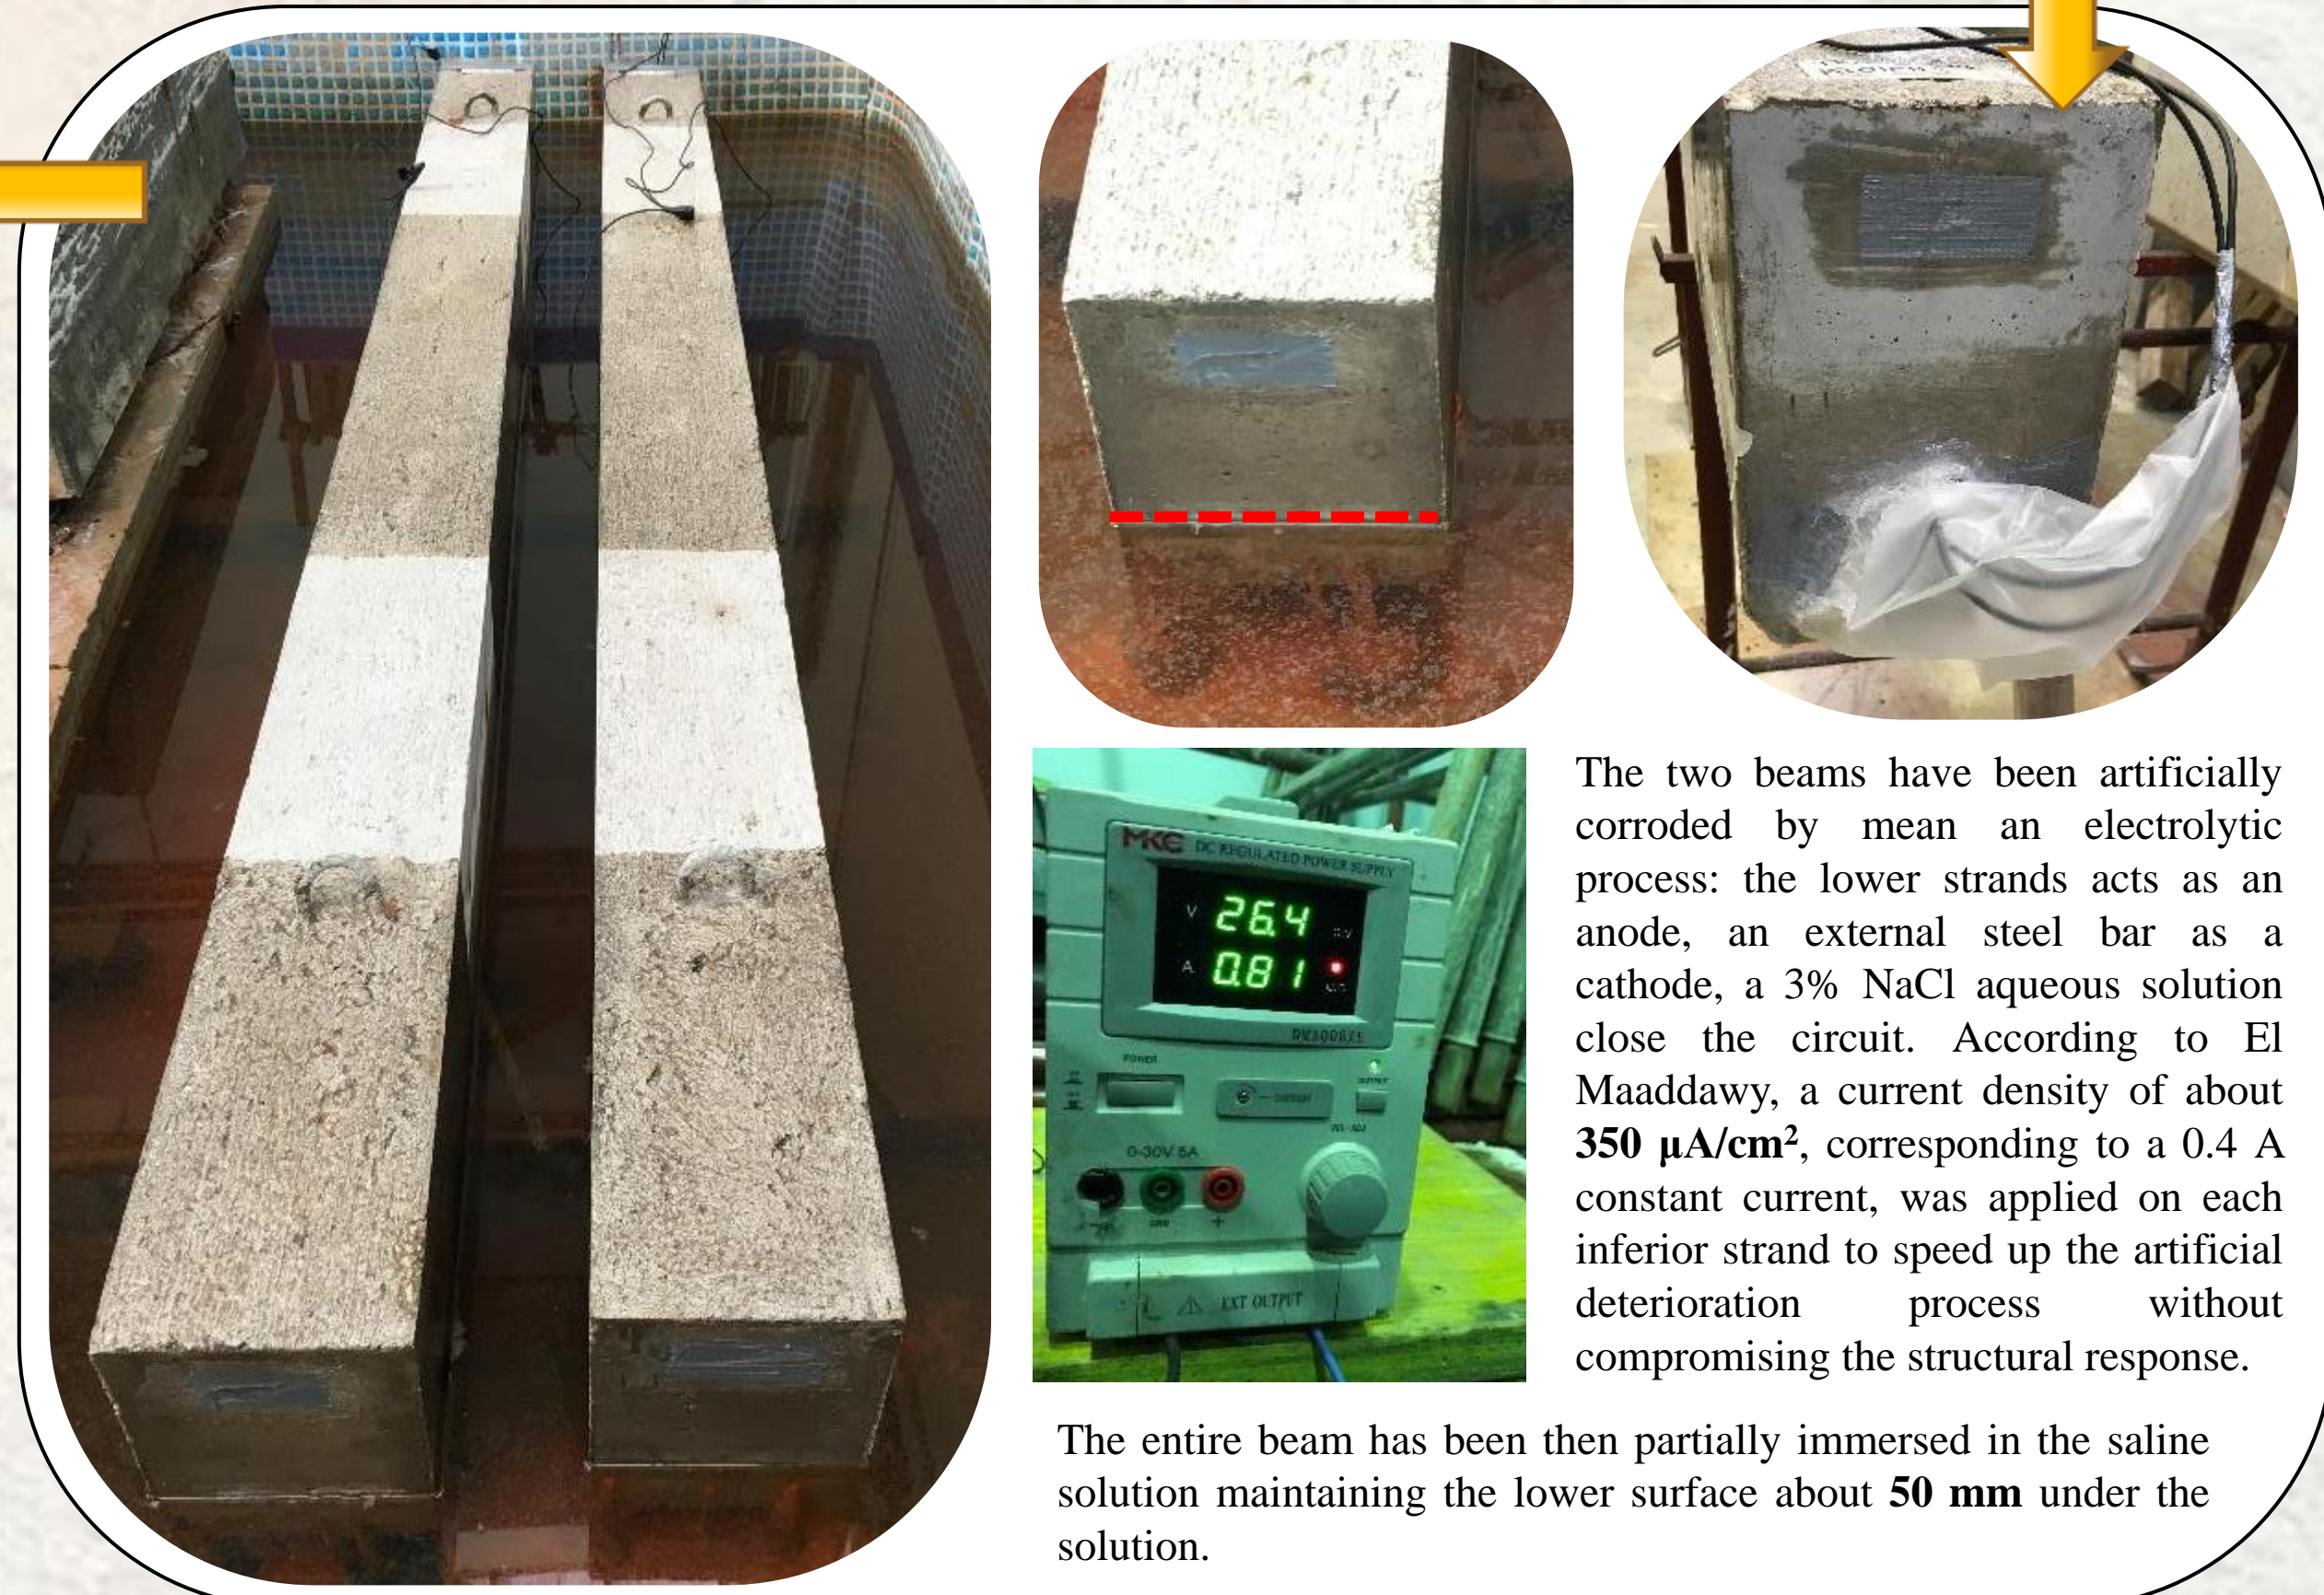

## Main experimental results

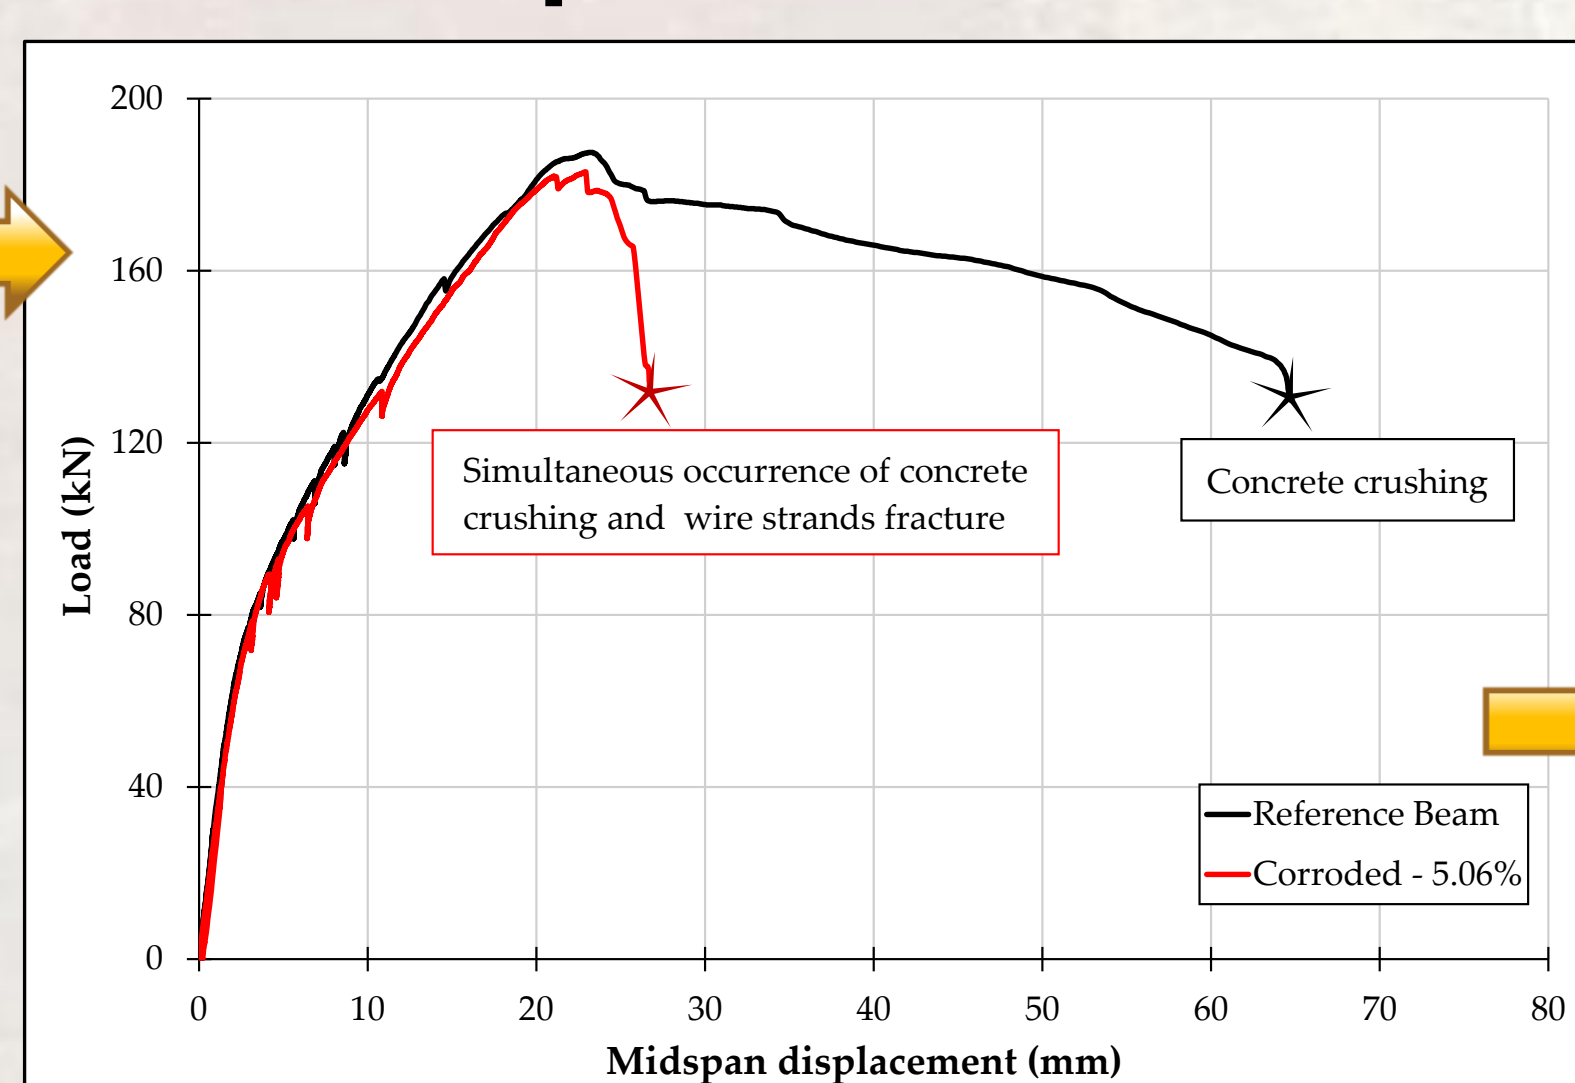

The obtained results in terms of load-displacement curve for the sound and corroded beams are reported. A softening branch can be detected for the sound beam that collapsed for the combined concrete crushing and buckling of the compressed reinforcement. For the corroded beam a brittle failure, without any ductility retention can be detected.

## Crack pattern

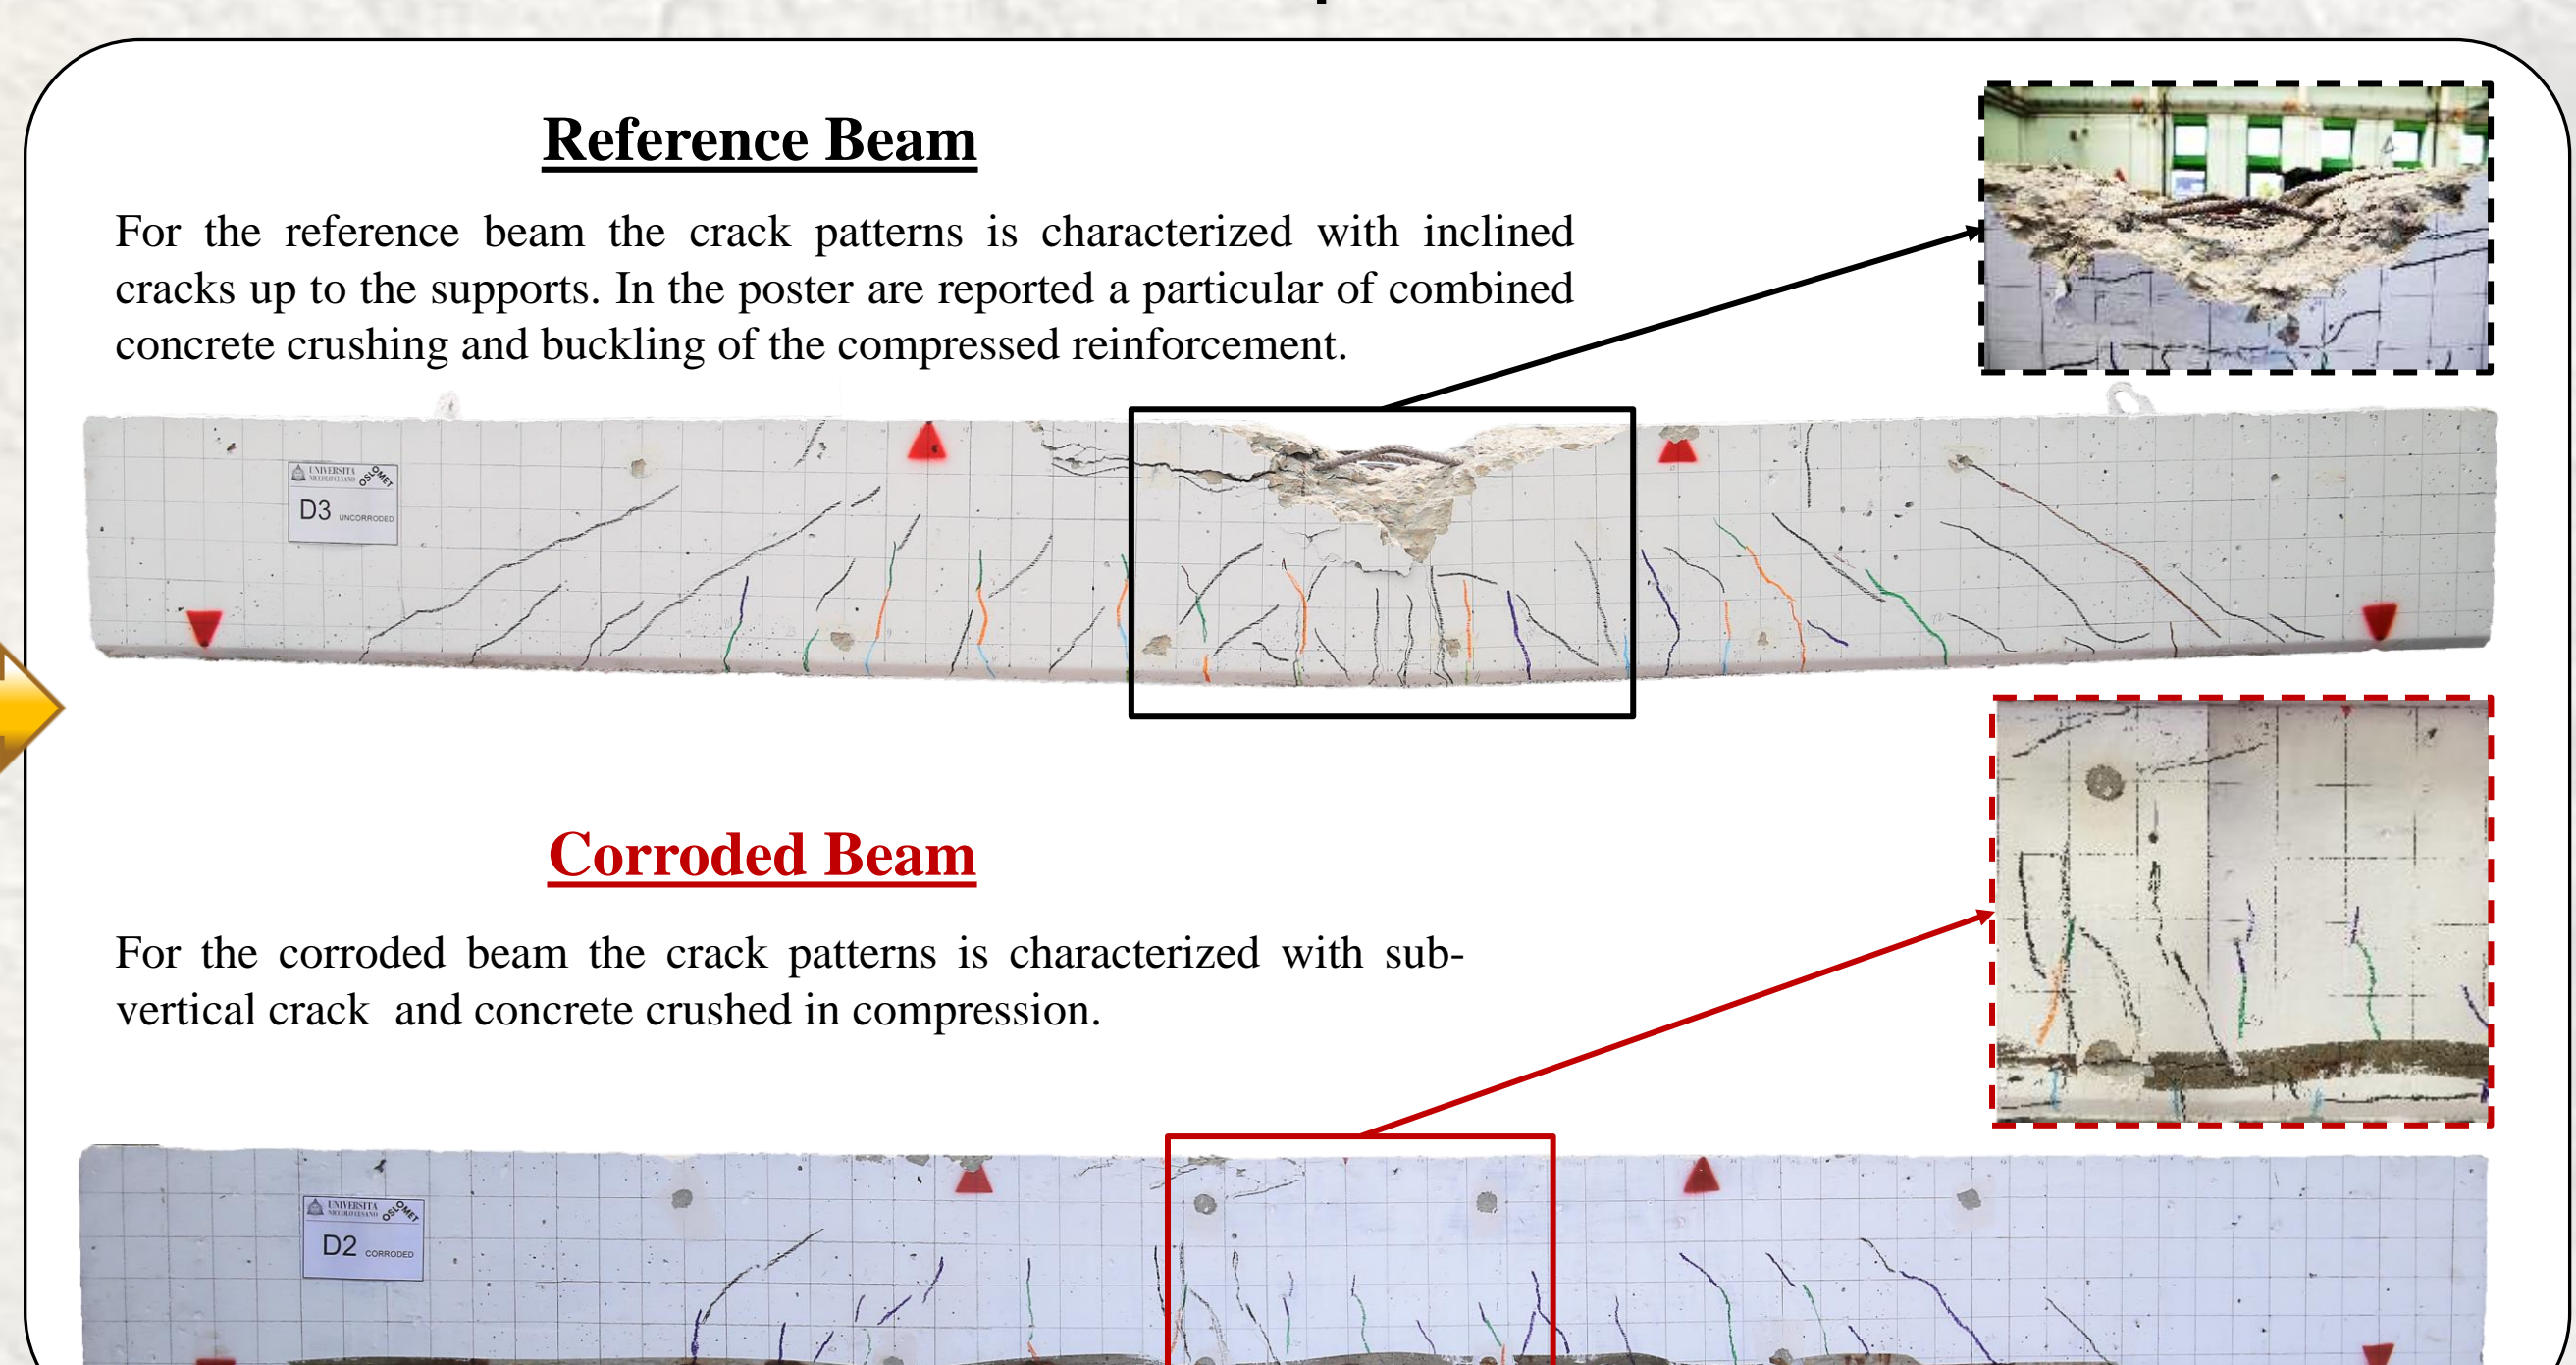

## References

Benenato, A., Ferracuti, B., Imperatore, S., & Kioumarsi, (2020, December). Behaviour of prestressed concrete beams damaged by corrosion. In CACRCS DAYS 2020. Capacity Assessment of Corroded Reinforced Concrete Structures. Workshop Online, from 1 to 4 December 2020

Kioumarsi, M., Benenato, A., Ferracuti, B., & Imperatore, S. (2021). Residual Flexural Capacity of Corroded Prestressed Reinforced Concrete Beams. *Metals*, 11(3), 442.
